# Supplementary material for: Effect of Combined Intraosseous and Intraarticular Infiltrations of Autologous Platelet-Rich Plasma on Subchondral Bone Marrow Mesenchymal Stromal Cells from Patients with Hip Osteoarthritis
Source: MDPI journal article supplement (doi:10.3390/jcm11133891), 2022-07-04
Supplement: s1 [file s1]

# Supplementary Figure S1

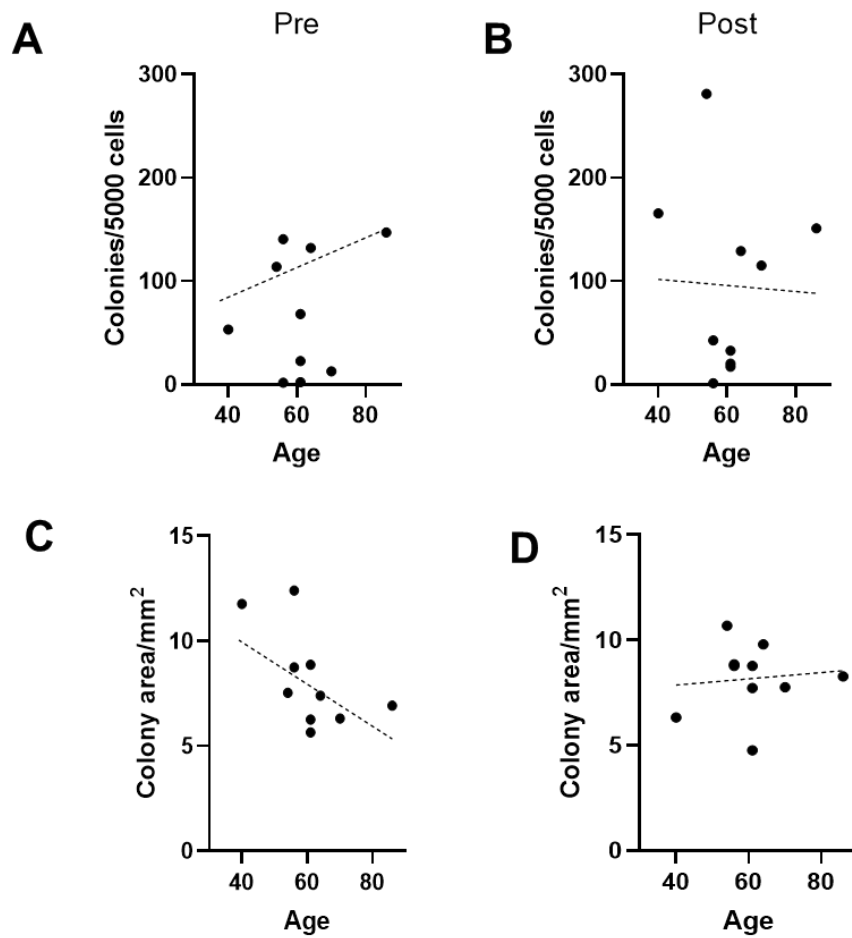

**Correlation of CFU-F frequencies:** (A) Correlation of CFU-F frequencies per 5000 MSCs with advancing age in the pre samples ( $R=0.258$ ) (B) Correlation of CFU-F frequencies per 5000 MSCs with advancing age in the post samples ( $R=0.039$ ) (C) Correlation of CFU-F colony areas with advancing age in the pre samples ( $R=0.596$ ) (D) Correlation of CFU-F colony areas with advancing age in the post samples ( $R=.104$ )

**Supplementary table S1: List for genes and probes for qPCR**

| No | Gene Name                                                        | Gene ID  | Assay         | Category                                          |
|----|------------------------------------------------------------------|----------|---------------|---------------------------------------------------|
| 1  | Runt related transcription factor 2                              | RUNX2    | Hs00231692_m1 | Osteogenesis and bone remodelling                 |
| 2  | Alkaline phosphatase                                             | ALP      | Hs00758162_m1 |                                                   |
| 3  | Integrin binding sialoprotein                                    | IBSP     | Hs00173720_m1 |                                                   |
| 4  | Collagen Type I Alpha 1 Chain                                    | COL1A1   | Hs01076777_m1 |                                                   |
| 5  | Bone Gamma-Carboxyglutamate Protein                              | BGLAP    | Hs01587814_g1 |                                                   |
| 6  | Secreted Phosphoprotein 1                                        | SPP1     | Hs00959010_m1 |                                                   |
| 7  | Secreted Protein Acidic And Cysteine Rich                        | SPARC    | Hs00277762_m1 |                                                   |
| 8  | Receptor activator of nuclear factor kappa-B Ligand              | RANKL    | Hs01092186_m1 |                                                   |
| 9  | Osteoprotegerin                                                  | OPG      | Hs00900360_m1 |                                                   |
| 10 | Human homolog of the murine progressive ankylosis gene           | ANKH     | Hs01064613_m1 |                                                   |
| 11 | Gremlin 1, DAN Family BMP Antagonist                             | GREM1    | Hs00171951_m1 |                                                   |
| 12 | Podoplanin                                                       | PDPN/E11 | Hs00366766_m1 |                                                   |
| 13 | Bone Morphogenetic Protein 2                                     | BMP2     | Hs00154192_m1 |                                                   |
| 14 | Osteomodulin                                                     | OMD      | Hs00192325_m1 |                                                   |
| 15 | Parathyroid Hormone Like Hormone                                 | PTH1H    | Hs00174969_m1 | Chondrogenesis and cartilage homeostasis          |
| 16 | Sex determining region Y box 9                                   | SOX9     | Hs00165814_m1 |                                                   |
| 17 | Cartilage Oligomeric Matrix Protein                              | COMP     | Hs00164359_m1 |                                                   |
| 18 | Aggrecan                                                         | ACAN     | Hs00153936_m1 |                                                   |
| 19 | Matrix Metalloproteinase 1                                       | MMP1     | Hs00899658_m1 |                                                   |
| 20 | Matrix Metalloproteinase 3                                       | MMP3     | Hs00968308_m1 |                                                   |
| 21 | Matrix Metalloproteinase 13                                      | MMP13    | Hs00942589_m1 |                                                   |
| 22 | Matrix Metalloproteinase 9                                       | MMP9     | Hs00957562_m1 |                                                   |
| 23 | A disintegrin and metalloproteinase with thrombospondin motifs 4 | ADAMTS4  | Hs00192708_m1 |                                                   |
| 24 | A disintegrin and metalloproteinase with thrombospondin motifs 4 | ADAMTS5  | Hs01095524_m1 |                                                   |
| 25 | Collagen Type X Alpha 1 Chain                                    | COL10A1  | Hs00166657_m1 |                                                   |
| 26 | Serpin Family E Member 1                                         | SERPINE1 | Hs00167155_m1 |                                                   |
| 27 | Stathmin 2                                                       | STMN2    | Hs00975800_m1 |                                                   |
| 28 | Tissue inhibitor of metalloproteinase- 1                         | TIMP1    | Hs00171558_m1 |                                                   |
| 29 | Tissue inhibitor of metalloproteinase- 2                         | TIMP2    | Hs01091319_m1 |                                                   |
| 30 | Tissue inhibitor of metalloproteinase- 3                         | TIMP3    | Hs00927214_m1 |                                                   |
| 31 | Prostaglandin-Endoperoxide Synthase 2                            | PTGS2    | Hs00153133_m1 | Adipogenesis and stromal support for angiogenesis |
| 32 | Peroxisome Proliferator Activated Receptor Gamma                 | PPAR-γ   | Hs00602622_m1 |                                                   |
| 33 | Fatty Acid Binding Protein 4                                     | FABP4    | Hs00609791_m1 |                                                   |
| 34 | C-X-C Motif Chemokine Ligand 12                                  | CXCL12   | Hs00171022_m1 |                                                   |
| 35 | Vascular Endothelial Growth Factor A                             | VEGFA    | Hs00900058_m1 |                                                   |
| 36 | Vascular Endothelial Growth Factor C                             | VEGFC    | Hs01099206_m1 |                                                   |

|    |                                                |            |               |                       |
|----|------------------------------------------------|------------|---------------|-----------------------|
| 37 | Platelet derived growth factor receptor beta   | PDGFRB     | Hs01019589_m1 | MSC autocrine support |
| 38 | Epidermal growth factor receptor               | EGFR       | Hs01076078_m1 |                       |
| 39 | Fibroblast growth factor receptor 1            | FGFR1      | Hs00241111_m1 |                       |
| 40 | Fibroblast growth factor receptor 2            | FGFR2      | Hs01552926_m1 |                       |
| 41 | Transforming growth factor beta receptor 2     | TGFBR2     | Hs00559661_m1 |                       |
| 42 | Protein Tyrosine Phosphate Receptor type C     | PTPRC      | Hs00898487_s1 | CD45                  |
| 43 | 5'-Nucleotidase Ecto                           | NT5E       | Hs00159686_m1 | CD73                  |
| 44 | Thy-1 cell surface antigen                     | Thy1       | Hs06633377_s1 | CD90                  |
| 45 | Cyclin dependent kinase inhibitor 1A (AKA p21) | p21/CDKN1A | Hs00355782_m1 | Senescence/cell cycle |
| 46 | Tumour protein 53                              | p53        | Hs01034249_m1 |                       |
| 47 | Cyclin dependent kinase inhibitor 2A (AKA p16) | p16/CDKN2A | Hs00923894_m1 |                       |
| 48 | Hypoxanthine phosphoribosyl transferase 1      | HPRT1      | Hs99999909_m1 | House-keeping gene    |
